# Supplementary material for: Steam Explosion Pre-Treatment of Sawdust for Biofuel Pellets
Source: MDPI journal article supplement (doi:10.3390/cleantechnol4040072), 2022-11-15
Supplement: s1 [file s1]

Archive with 1 entries (1 files):
- cleantechnol-1996251-supplementary.pdf
