# Supplementary material for: Steam Explosion Pre-Treatment of Sawdust for Biofuel Pellets
Source: MDPI journal article supplement (doi:10.3390/cleantechnol4040072), 2022-11-15
Supplement: s1 [file s1 › cleantechnol-1996251-supplementary.pdf]

## Supplementary Materials

**Table S1.** ANOVA for response surface quadratic model of bulk density as affected by temperature and residence time of steam explosion pretreatment.

| Source                    | Sum of Squares | df | Mean Square | F Value | p-value |                        |
|---------------------------|----------------|----|-------------|---------|---------|------------------------|
| <b>Model</b>              | 366.16         | 5  | 73.23       | 5.07    | 0.02    | <b>significant</b>     |
| <b>A-Temperature (°C)</b> | 21.66          | 1  | 21.66       | 1.50    | 0.26    |                        |
| <b>B-Time (min)</b>       | 8.64           | 1  | 8.64        | 0.59    | 0.46    |                        |
| <b>AB</b>                 | 144            | 1  | 144         | 9.97    | 0.01    |                        |
| <b>A<sup>2</sup></b>      | 190.42         | 1  | 190.42      | 13.19   | 0.00    |                        |
| <b>B<sup>2</sup></b>      | 17.21          | 1  | 17.21       | 1.19    | 0.31    |                        |
| <b>Residual</b>           | 101.04         | 7  | 14.43       |         |         |                        |
| <b>Lack of Fit</b>        | 73.15          | 3  | 24.38       | 3.49    | 0.12    | <b>not significant</b> |

**Table S2.** ANOVA for response surface quadratic model of particle density as affected by temperature and residence time of steam explosion pretreatment.

| Source                    | Sum of Squares | df | Mean Square | F Value | p-value |                        |
|---------------------------|----------------|----|-------------|---------|---------|------------------------|
| <b>Model</b>              | 3966.18        | 5  | 793.23      | 3.28    | 0.07    | <b>not significant</b> |
| <b>A-Temperature (°C)</b> | 345.04         | 1  | 345.04      | 1.42    | 0.27    |                        |
| <b>B-Time (min)</b>       | 607.02         | 1  | 607.02      | 2.51    | 0.15    |                        |
| <b>AB</b>                 | 956.35         | 1  | 956.35      | 3.95    | 0.08    |                        |
| <b>A<sup>2</sup></b>      | 1870.51        | 1  | 1870.51     | 7.74    | 0.02    |                        |
| <b>B<sup>2</sup></b>      | 14.62          | 1  | 14.62       | 0.06    | 0.81    |                        |
| <b>Residual</b>           | 1691.48        | 7  | 241.64      |         |         |                        |
| <b>Lack of Fit</b>        | 629.78         | 3  | 209.92      | 0.79    | 0.55    | <b>not significant</b> |

**Table S3.** ANOVA for for response surface quadratic model of pellet density as affected by temperature and residence time of steam explosion pretreatment.

| Source                    | Sum of Squares | df | Mean Square | F Value | p-value |                    |
|---------------------------|----------------|----|-------------|---------|---------|--------------------|
| <b>Model</b>              | 27195.52       | 5  | 5439.10     | 10.42   | 0.00    | <b>significant</b> |
| <b>A-Temperature (°C)</b> | 17003.31       | 1  | 17003.31    | 32.59   | 0.00    |                    |
| <b>B-Time (min)</b>       | 2276.19        | 1  | 2276.19     | 4.36    | 0.07    |                    |

|                      |         |   |         |      |      |                        |
|----------------------|---------|---|---------|------|------|------------------------|
| <b>AB</b>            | 0.40    | 1 | 0.40    | 0.00 | 0.97 |                        |
| <b>A<sup>2</sup></b> | 2051.47 | 1 | 2051.47 | 3.93 | 0.08 |                        |
| <b>B<sup>2</sup></b> | 2867.47 | 1 | 2867.47 | 5.49 | 0.05 |                        |
| <b>Residual</b>      | 3651.10 | 7 | 521.58  |      |      |                        |
| <b>Lack of Fit</b>   | 2890.36 | 3 | 963.45  | 5.06 | 0.07 | <b>not significant</b> |

**Table S4.** ANOVA for for response surface quadratic model of tensile strength as affected by temperature and residence time of steam explosion pretreatment.

| <b>Source</b>             | <b>Sum of Squares</b> | <b>df</b> | <b>Mean Square</b> | <b>F Value</b> | <b>p-value</b> |                        |
|---------------------------|-----------------------|-----------|--------------------|----------------|----------------|------------------------|
| <b>Model</b>              | 19.73                 | 5         | 3.94               | 3.27           | 0.07           | <b>not significant</b> |
| <b>A-Temperature (°C)</b> | 8.68                  | 1         | 8.68               | 7.20           | 0.03           |                        |
| <b>B-Time (min)</b>       | 0.37                  | 1         | 0.37               | 0.31           | 0.59           |                        |
| <b>AB</b>                 | 0.74                  | 1         | 0.74               | 0.62           | 0.45           |                        |
| <b>A<sup>2</sup></b>      | 3.57                  | 1         | 3.57               | 2.96           | 0.12           |                        |
| <b>B<sup>2</sup></b>      | 2.58                  | 1         | 2.58               | 2.14           | 0.18           |                        |
| <b>Residual</b>           | 8.44                  | 7         | 1.20               |                |                |                        |
| <b>Lack of Fit</b>        | 3.59                  | 3         | 1.19               | 0.98           | 0.48           | <b>not significant</b> |

**Table S5.** ANOVA for for response surface quadratic model of dimensional stability as affected by temperature and residence time of steam explosion pretreatment.

| <b>Source</b>             | <b>Sum of Squares</b> | <b>df</b> | <b>Mean Square</b> | <b>F Value</b> | <b>p-value</b> |                        |
|---------------------------|-----------------------|-----------|--------------------|----------------|----------------|------------------------|
| <b>Model</b>              | 0.00                  | 5         | 0.00               | 5.03           | 0.02           | <b>significant</b>     |
| <b>A-Temperature (°C)</b> | 0.00                  | 1         | 0.00               | 18.35          | 0.00           |                        |
| <b>B-Time (min)</b>       | 1.67E-05              | 1         | 1.67E-05           | 0.37           | 0.55           |                        |
| <b>AB</b>                 | 0.00                  | 1         | 0.00               | 2.24           | 0.17           |                        |
| <b>A<sup>2</sup></b>      | 9.93E-06              | 1         | 9.93E-06           | 0.22           | 0.65           |                        |
| <b>B<sup>2</sup></b>      | 0.00                  | 1         | 0.00               | 4.07           | 0.08           |                        |
| <b>Residual</b>           | 0.00                  | 7         | 4.45E-05           |                |                |                        |
| <b>Lack of Fit</b>        | 0.00                  | 3         | 6.38E-05           | 2.12           | 0.23           | <b>not significant</b> |

**Table S6.** ANOVA for for response surface quadratic model of ash content as affected by temperature and residence time of steam explosion pretreatment.

| <b>Source</b>             | <b>Sum of Squares</b> | <b>df</b> | <b>Mean Square</b> | <b>F Value</b> | <b>p-value</b> |                    |
|---------------------------|-----------------------|-----------|--------------------|----------------|----------------|--------------------|
| <b>Model</b>              | 1.10                  | 5         | 0.22               | 12.10          | 0.00           | <b>significant</b> |
| <b>A-Temperature (°C)</b> | 0.62                  | 1         | 0.62               | 34.09          | 0.00           |                    |
| <b>B-Time (min)</b>       | 0.06                  | 1         | 0.06               | 3.40           | 0.10           |                    |
| <b>AB</b>                 | 0.09                  | 1         | 0.09               | 5.10           | 0.05           |                    |
| <b>A<sup>2</sup></b>      | 0.31                  | 1         | 0.31               | 17.48          | 0.00           |                    |

|                      |       |   |      |       |      |                    |
|----------------------|-------|---|------|-------|------|--------------------|
| <b>B<sup>2</sup></b> | 0.017 | 1 | 0.01 | 0.98  | 0.35 |                    |
| <b>Residual</b>      | 0.12  | 7 | 0.01 |       |      |                    |
| <b>Lack of Fit</b>   | 0.11  | 3 | 0.03 | 10.21 | 0.02 | <b>significant</b> |

**Table S7.** ANOVA for response surface quadratic model of high heating value (HHV) as affected by temperature and residence time of steam explosion pretreatment.

| Source                    | Sum of Squares | df | Mean Square | F Value | p-value |                        |
|---------------------------|----------------|----|-------------|---------|---------|------------------------|
| <b>Model</b>              | 0.87           | 5  | 0.17        | 14.61   | 0.00    | <b>significant</b>     |
| <b>A-Temperature (°C)</b> | 0.16           | 1  | 0.16        | 13.34   | 0.00    |                        |
| <b>B-Time (min)</b>       | 0.25           | 1  | 0.25        | 21.36   | 0.00    |                        |
| <b>AB</b>                 | 0.00           | 1  | 0.00        | 0.16    | 0.69    |                        |
| <b>A<sup>2</sup></b>      | 0.36           | 1  | 0.36        | 30.82   | 0.00    |                        |
| <b>B<sup>2</sup></b>      | 0.00           | 1  | 0.00        | 0.15    | 0.70    |                        |
| <b>Residual</b>           | 0.08           | 7  | 0.01        |         |         |                        |
| <b>Lack of Fit</b>        | 0.03           | 3  | 0.01        | 0.76    | 0.56    | <b>not significant</b> |

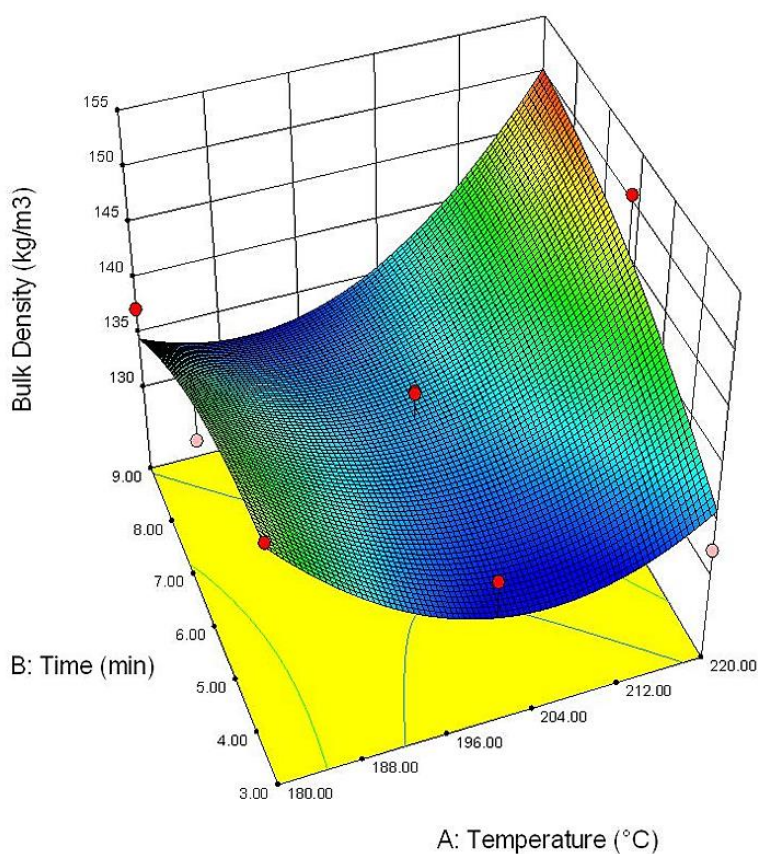

**Figure S1.** Response surface chart for bulk density of steam treated sawdust as affected by temperature and residence time of steam explosion pretreatment.

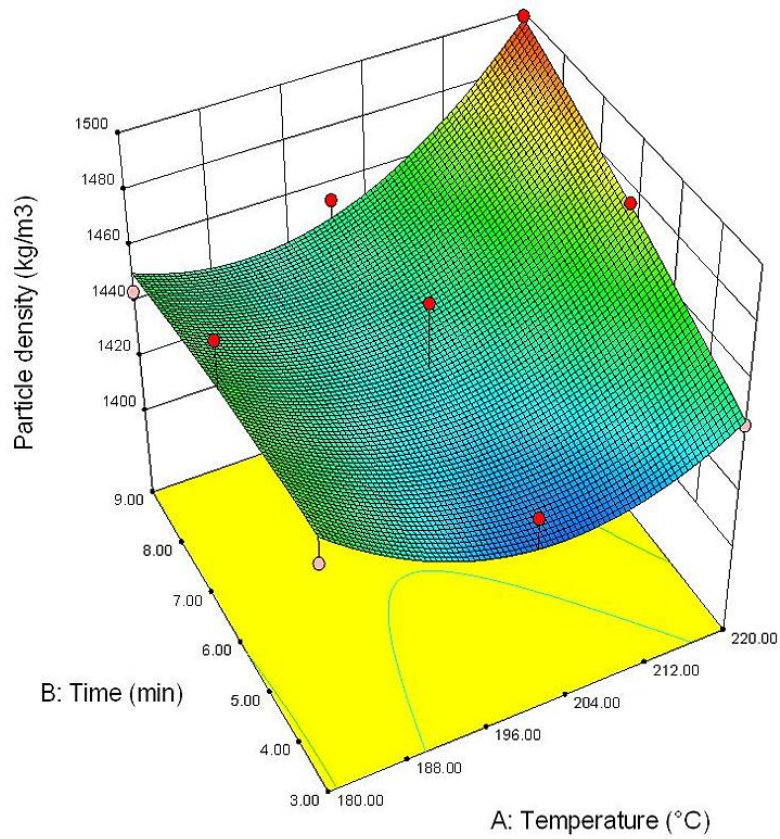

**Figure S2.** Response surface chart for particle density of steam treated sawdust as affected by temperature and residence time of steam explosion pretreatment.

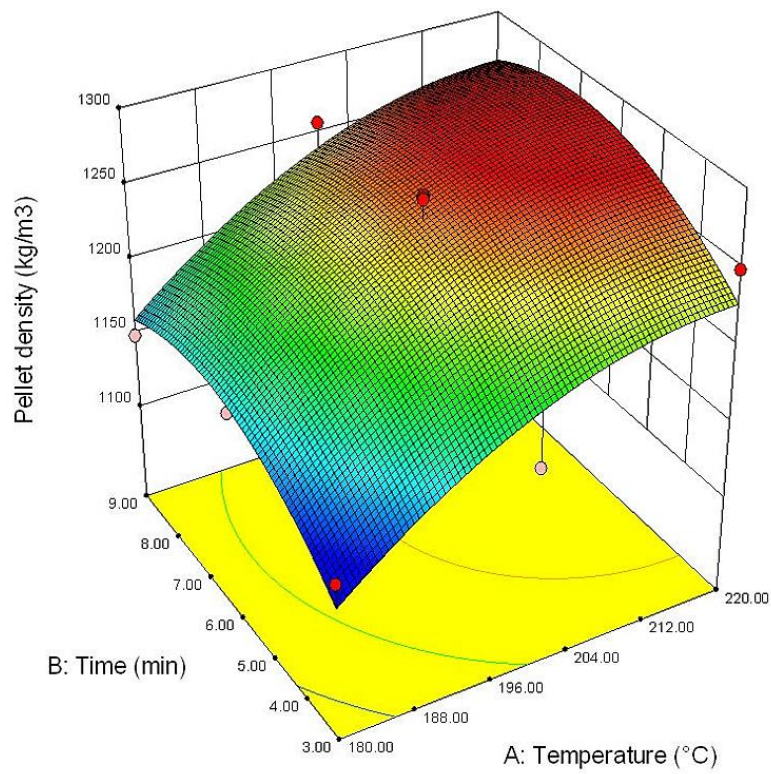

**Figure S3.** Response surface chart for pellet density of steam treated pellets as affected by temperature and residence time of steam explosion pretreatment.

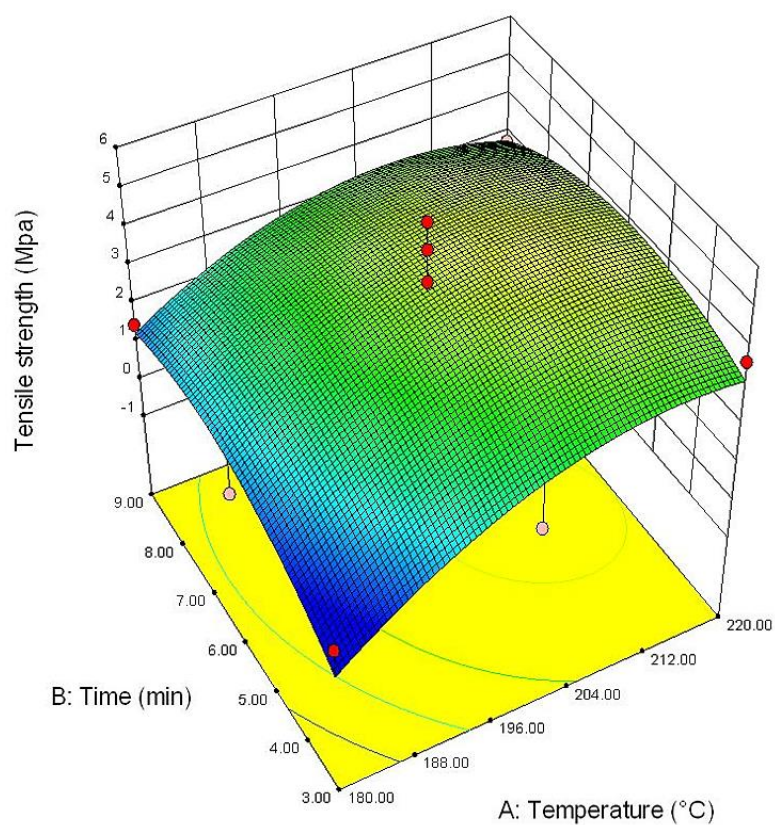

**Figure S4.** Response surface chart for tensile strength of steam treated pellets as affected by temperature and residence time of steam explosion pretreatment.

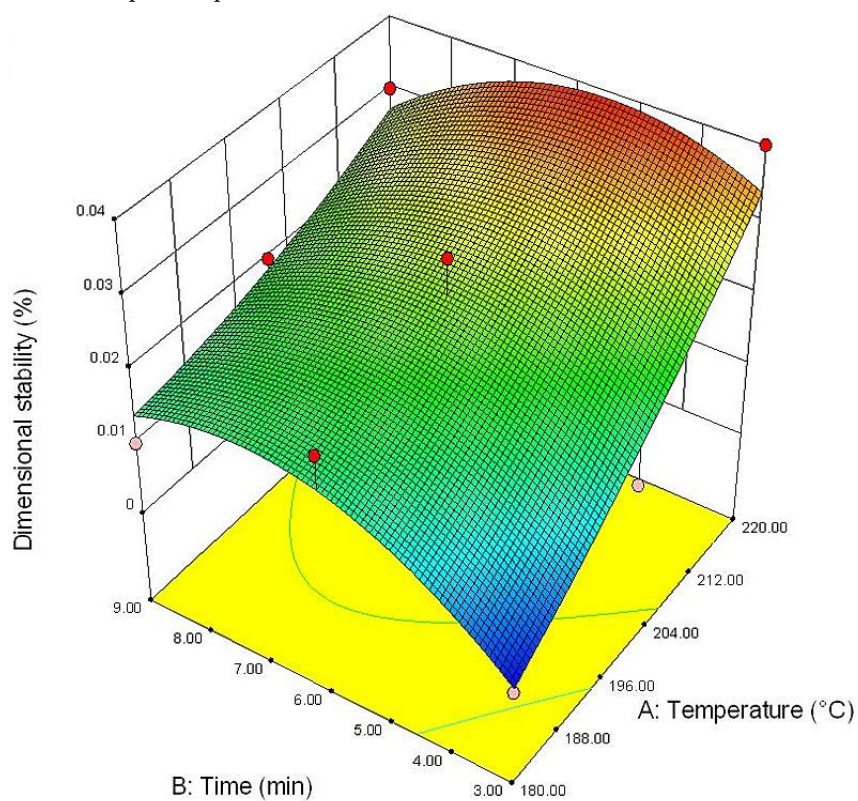

**Figure S5.** Response surface chart for dimensional stability of steam pretreated pellets as affected by temperature and residence time of steam explosion pretreatment.

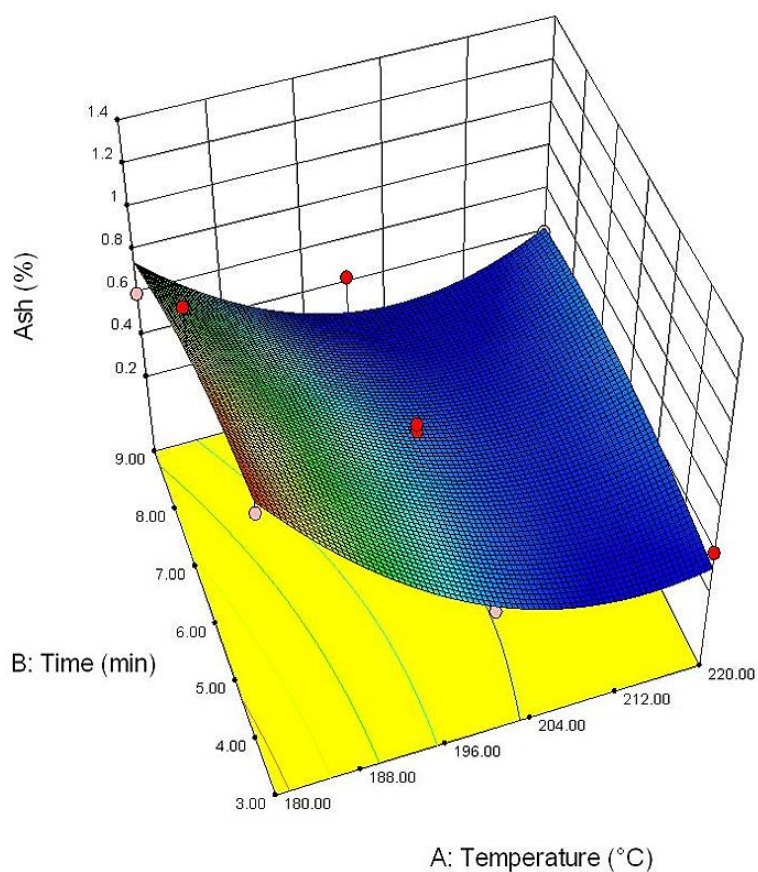

**Figure S6.** Response surface chart for ash content of steam pretreated sawdust as affected by temperature and residence time of steam explosion pretreatment.

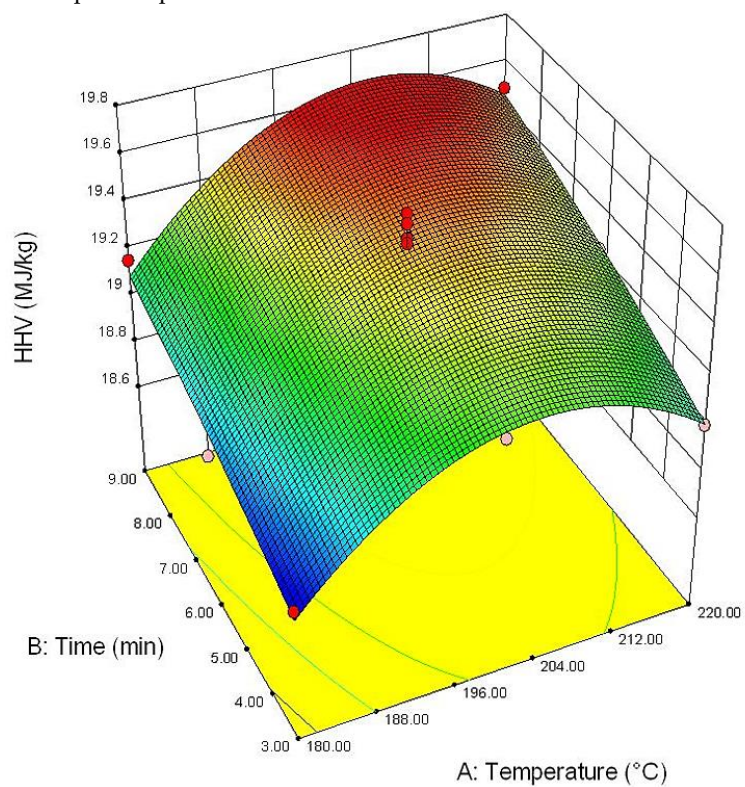

**Figure S7.** Response surface chart for higher heating value (HHV) of steam pretreated sawdust as affected by temperature and residence time of steam explosion pretreatment.
